# Supplementary material for: Lignin biosynthesis perturbations affect secondary cell wall composition and saccharification yield in Arabidopsis thaliana
Source: PubMed Central journal article supplement (PMC3661393; doi:10.1186/1754-6834-6-46), 2013-04-26

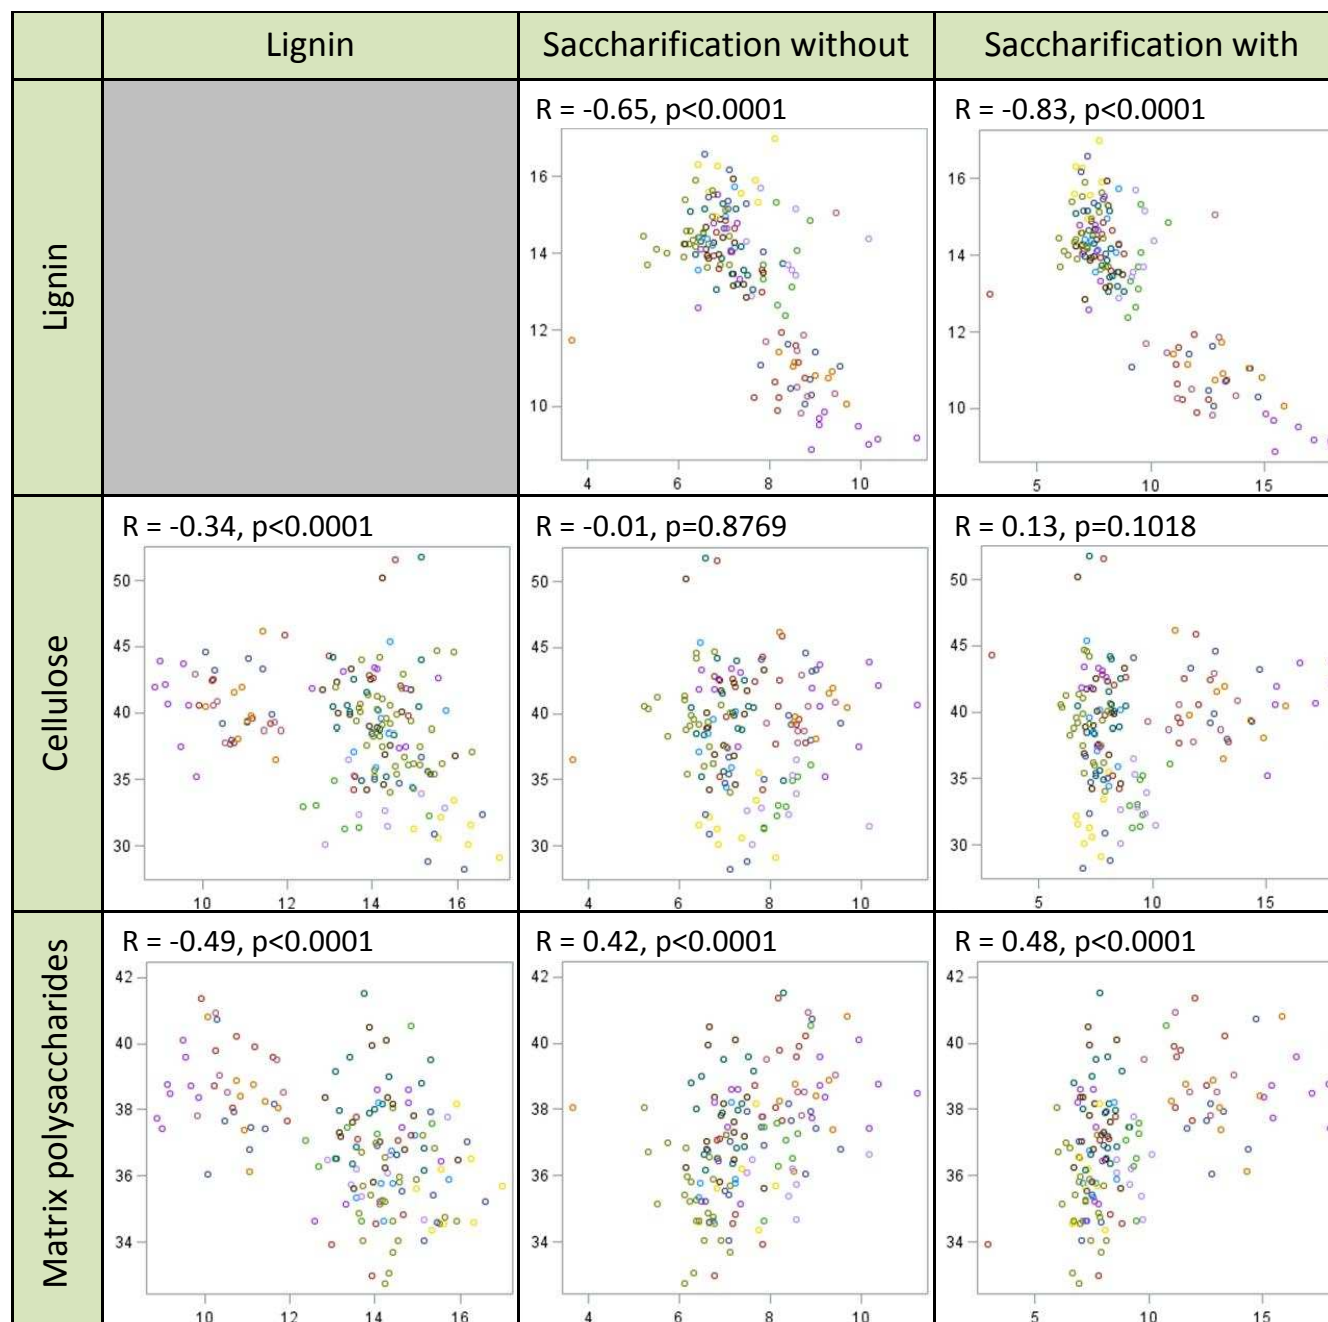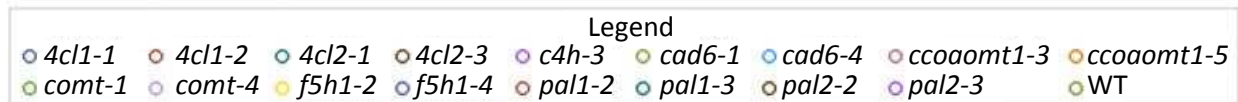

Supplement: 1754-6834-6-46-S2.pdf [file 1754-6834-6-46-S2.pdf]
